# Supplementary material for: Evidence of a polar cybotactic smectic A phase in a new fluorine substituted bent-core compound
Source: Royal Society of Chemistry journal article supplement (doi:10.1039/c1jm13140k), 2011-01-01
Supplement: c1jm13140k.pdf [file c1jm13140k.pdf]

# Evidence of a polar cybotactic smectic A phase in a new fluorine substituted bent-core compound

Mamatha Nagaraj,<sup>a</sup> Anne Lehmann,<sup>b</sup> Marko  
Prehm,<sup>b</sup> Carsten Tschierske,<sup>b</sup> and Jagdish K. Vij\*<sup>a</sup>

<sup>a</sup>*Department of Electronic and Electrical Engineering, Trinity  
College, University of Dublin, Dublin 2, Ireland, E-mail:  
jvij@tcd.ie*

<sup>b</sup>*Organic Chemistry, Institute of Chemistry, Martin-Luther-  
University Halle-Wittenberg, D-06120 Halle, Germany*

## Supporting Information

## 1. Synthesis and analytical data

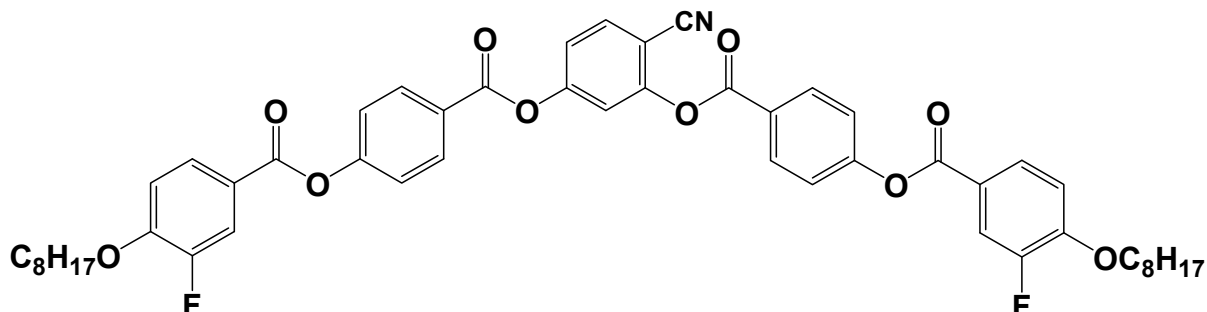

4-(3-Fluoro-4-octyloxybenzoyloxy)benzoic acid (0.15 g, 0.39 mmol) was stirred with thionyl chloride (10 ml) at 65 °C for 1 h to obtain a clear solution. After removing the excess thionyl chloride under reduced pressure the resulting acid chloride was dissolved in CH<sub>2</sub>Cl<sub>2</sub> (8 ml) followed by adding a solution of 4-cyanoresorcinol (0.03 g, 0.21 mmol), Et<sub>3</sub>N (0.07 ml, 0.50 mmol) and pyridine (0.01 ml) in CH<sub>2</sub>Cl<sub>2</sub> (10 ml). The reaction mixture was refluxed for 3 h. Water was added and the phases were separated, followed by the extraction of the aqueous phase with CH<sub>2</sub>Cl<sub>2</sub>. The combined organic phases were washed with HCl solution (10%), a saturated NaHCO<sub>3</sub> solution and water. After drying the solution over anhydrous MgSO<sub>4</sub> the solvent was removed. The crude product was purified by column chromatography (silica gel, 6 nm, CH<sub>2</sub>Cl<sub>2</sub>) and crystallisation from CHCl<sub>3</sub>/ EtOH (1:9) to yield 117 mg (0.133 mol, 69 %). <sup>1</sup>H NMR (500 MHz, CDCl<sub>3</sub>) δ 8.27 (d, *J* = 8.8 Hz, 2H, Ar-H), 8.20 (d, *J* = 8.8 Hz, 2H, Ar-H), 7.90 (d, *J* = 8.6 Hz, 2H, Ar-H), 7.84 (dt, *J* = 11.4, 2.4 Hz, 2H, Ar-H), 7.73 (d, *J* = 8.5 Hz, 1H, Ar-H), 7.47 (d, *J* = 2.2 Hz, 1H, Ar-H), 7.34 (d, *J* = 8.8 Hz, 2H, Ar-H), 7.33 (d, *J* = 8.8 Hz, 2H), 7.26 (dd, *J* = 8.5, 2.2 Hz, 1H, Ar-H), 6.98 (t, *J* = 8.3 Hz, 2H, Ar-H), 4.06 (t, *J* = 6.6 Hz, 4H, Ar-OCH<sub>2</sub>), 1.86 – 1.73 (m, 4H, CH<sub>2</sub>), 1.45 – 1.38 (m, 4H, CH<sub>2</sub>), 1.35 – 1.17 (m, 16H, CH<sub>2</sub>), 0.83 (t, *J* = 6.9 Hz, 6H, CH<sub>3</sub>). <sup>13</sup>C NMR (126 MHz, CDCl<sub>3</sub>) δ 163.35, 163.33, 163.31, 163.29, 163.18, 162.80, 155.74, 155.60, 154.73, 153.41, 152.89, 152.36, 152.32, 152.28, 152.24, 150.92, 133.94, 132.27, 132.02, 127.56, 127.54, 125.90, 125.52, 122.26, 122.21, 121.14, 121.08, 121.07, 121.02, 120.00, 117.94, 117.92, 117.78, 117.76, 117.35, 114.71, 113.48, 104.25, 69.50, 31.75, 29.24, 29.15, 28.95, 25.83, 22.61, 14.05. <sup>19</sup>F NMR (470 MHz, CDCl<sub>3</sub>) δ -133.67 (ddd, *J* = 27.3, 11.2, 8.2 Hz). C<sub>51</sub>H<sub>51</sub>F<sub>2</sub>NO<sub>10</sub>, calculated: C 69.93 %, H 5.87 %, N 1.60, found: C 69.71 %, H 5.82, N 1.55.

$^1\text{H}$  NMR

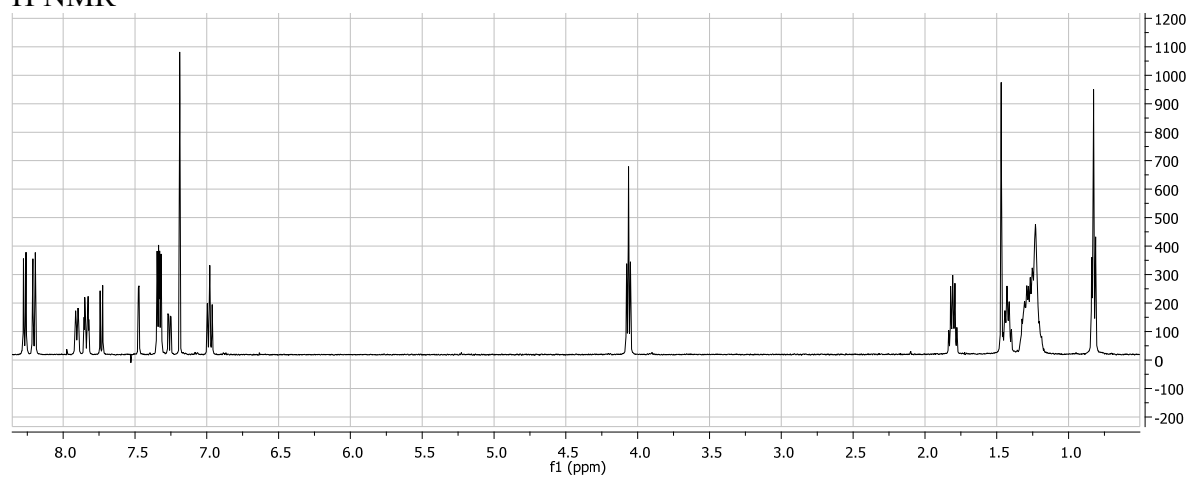

$^{13}\text{C}$  NMR

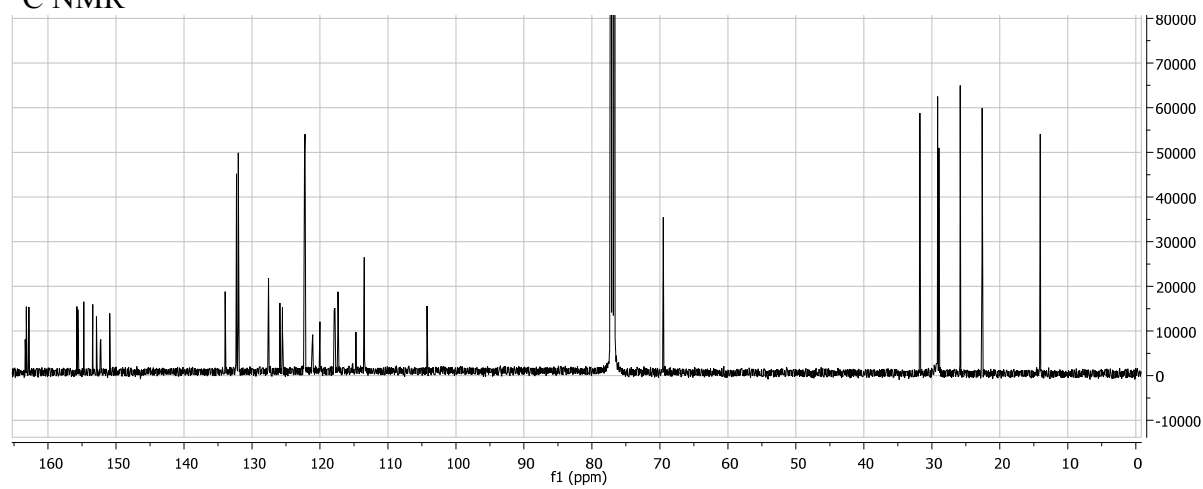

$^{19}\text{F}$  NMR

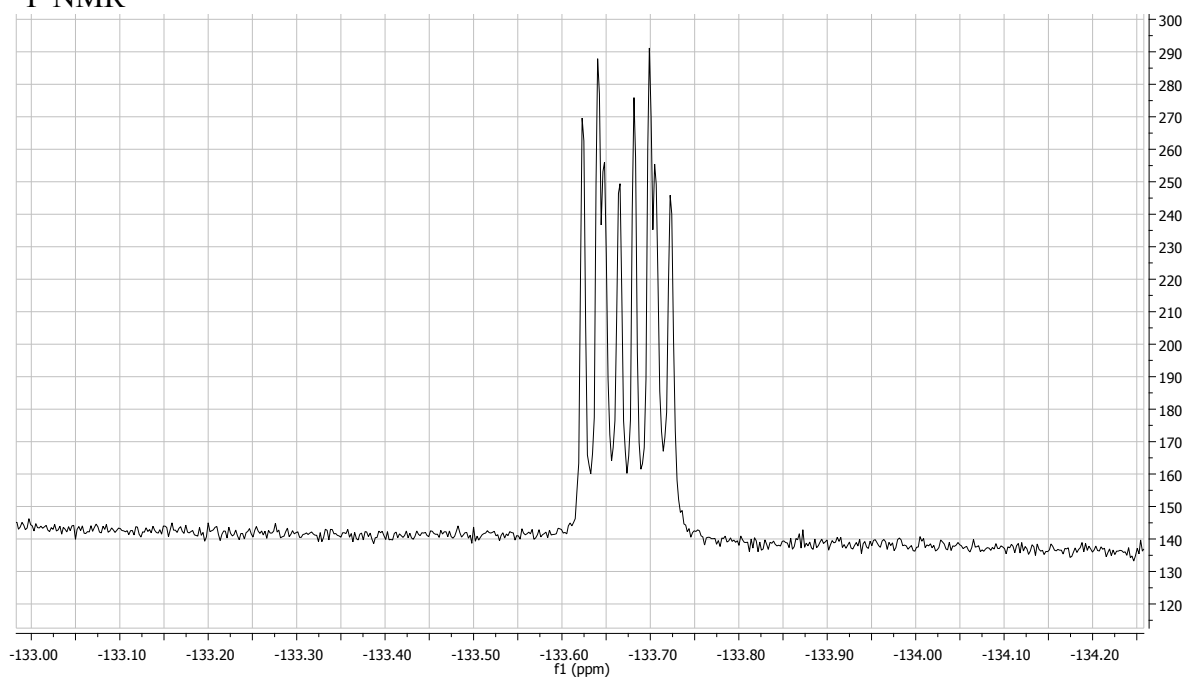

**Fig. S1.**  $^1\text{H}$ -,  $^{13}\text{C}$ - and  $^{19}\text{F}$ -NMR spectra ( $\text{CDCl}_3$ ) of PAL 21.

## 2. Additional data

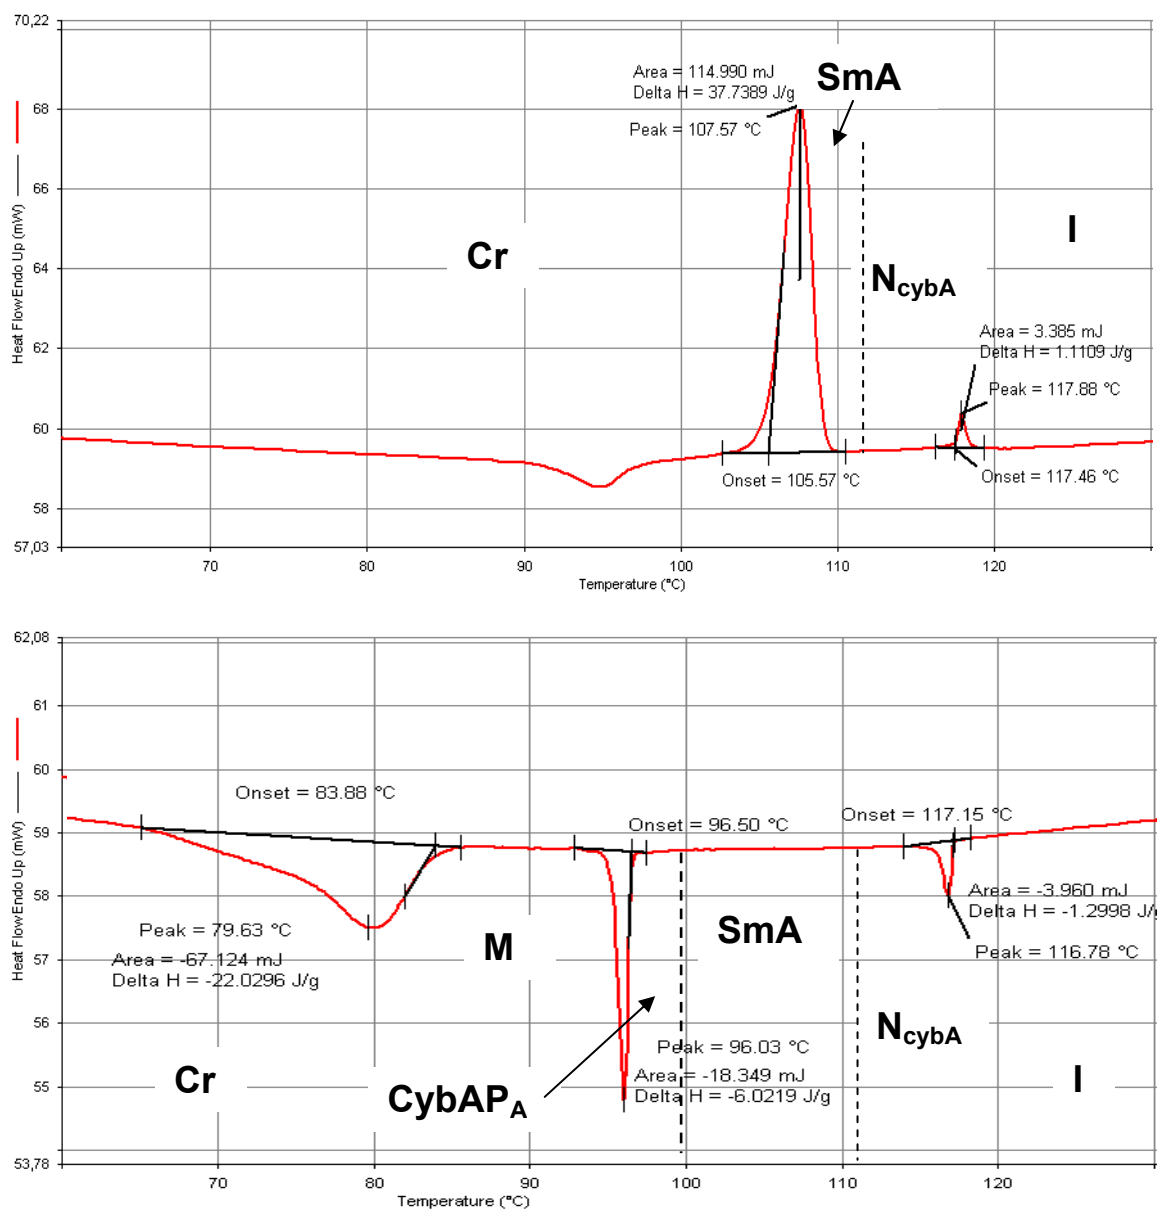

**Fig. S2.** DSC second heating (a) and cooling scans (b) of PAL21 at 10 K min<sup>-1</sup>.
